# Supplementary material for: Cell-Based Radiotracer Binding and Uptake Inhibition Assays: A Comparison of In Vitro Methods to Assess the Potency of Drugs That Target Monoamine Transporters
Source: PubMed Central journal article supplement (PMC7248194; doi:10.3389/fphar.2020.00673), 2020-05-19
Supplement: DataSheet_1.pdf [file DataSheet_1.pdf]

**Cell-based radiotracer binding and uptake inhibition assays: a comparison of in vitro methods to assess  
the potency of drugs that target monoamine transporters**

**Frontiers in Pharmacology**

Marija Ilic, Marion Holy, Kathrin Jaentsch, Matthias E. Liechti, Gert Lubec, Michael H. Baumann, Harald H. Sitte, and Dino Luethi

**Supplemental data**

Cocaine

MDPV

*d*-Amphetamine

MDMA

Fenfluramine

Mephedrone

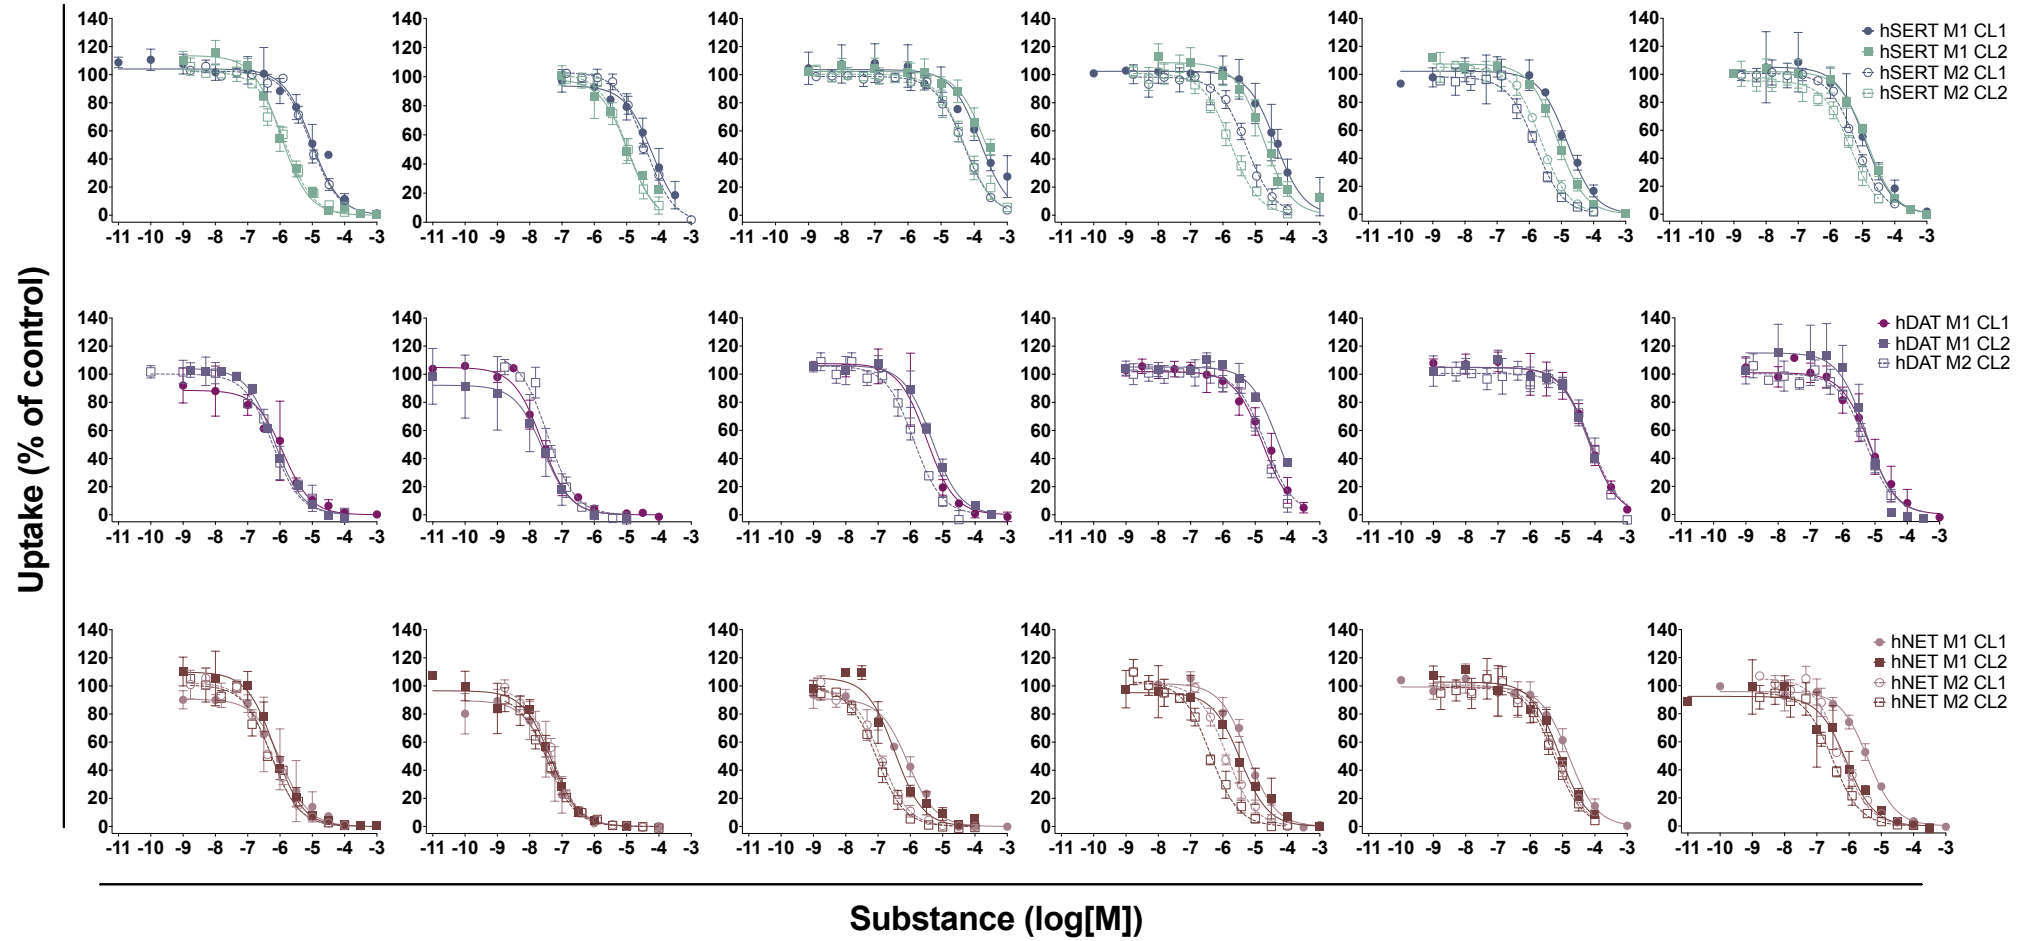

**Supplementary Figure 1.** Uptake inhibition at HEK 293 cells expressing human SERT, DAT, and NET. Concentration-response curves for the inhibition of specific [<sup>3</sup>H]-5-HT (upper section), [<sup>3</sup>H]-dopamine (middle section) and [<sup>3</sup>H]-MPP<sup>+</sup> or [<sup>3</sup>H]-norepinephrine (lower section) uptake by six stimulant substances. Data shown are the mean ± SD of at least three independent experiments performed in triplicates expressed as a % of control uptake. CL1 – cell line 1, CL2 – cell line 2, M1 – method 1 (adherent cells), M2 – method 2 (cells in suspension).

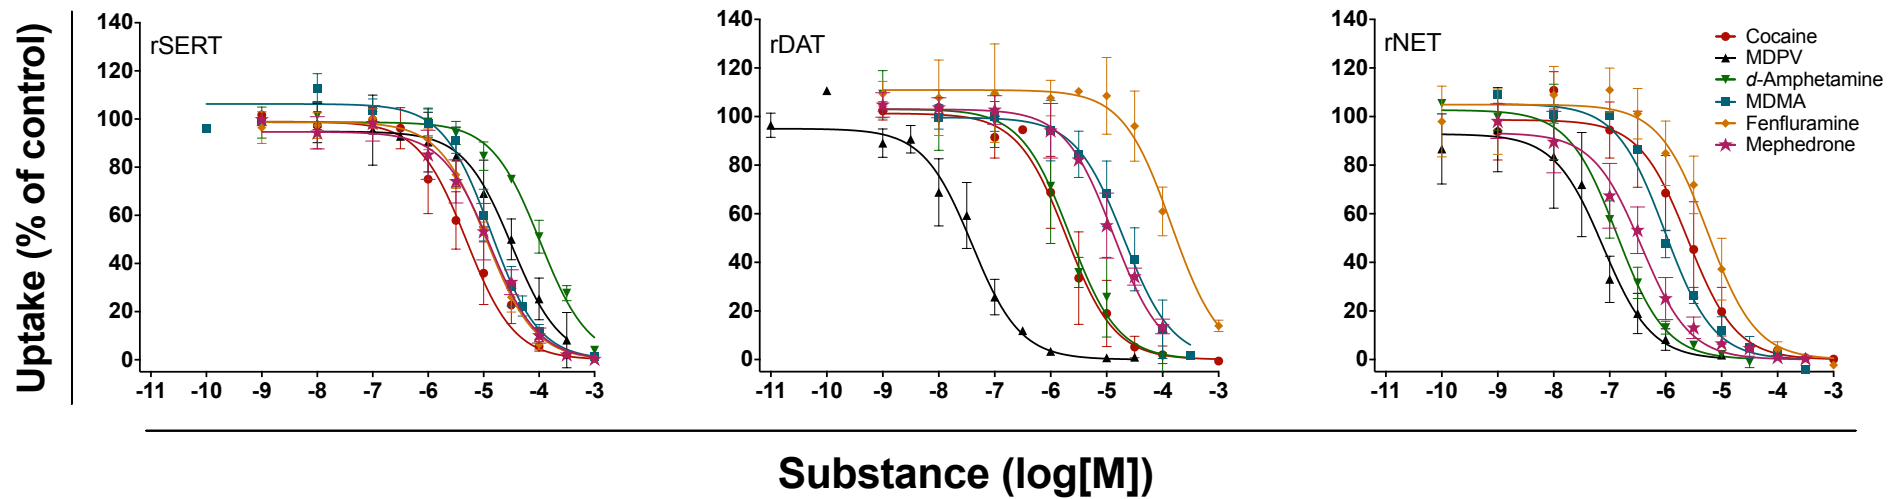

**Supplementary Figure 2.** Uptake inhibition at HEK 293 cells expressing rat SERT, DAT, and NET. Concentration-response curves for the inhibition of specific [<sup>3</sup>H]-5-HT (left), [<sup>3</sup>H]-dopamine (middle) and [<sup>3</sup>H]-MPP<sup>+</sup> (right) uptake by six stimulant substances. Data shown are the mean ± SD of at least three independent experiments performed in triplicates expressed as a % of control uptake.

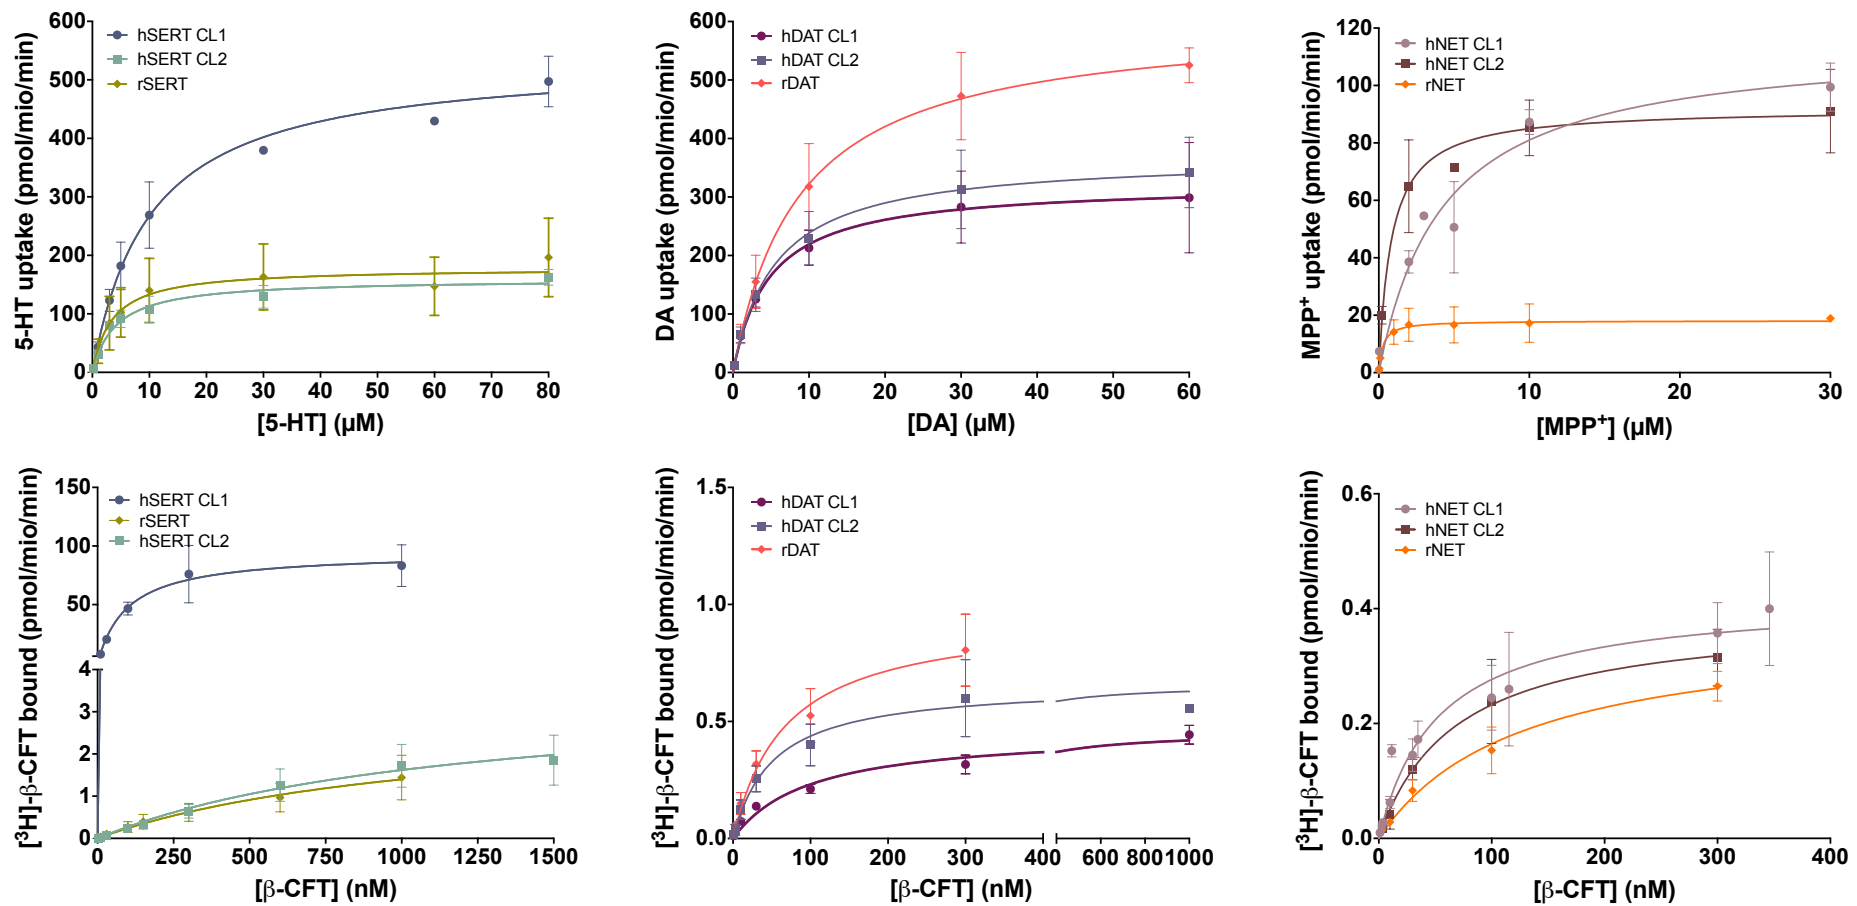

**Supplementary Figure 3.** Substrate saturation and radioligand binding saturation. Saturation plots of [<sup>3</sup>H]-5-HT, [<sup>3</sup>H]-dopamine and [<sup>3</sup>H]-MPP<sup>+</sup> uptake in HEK 293 cells expressing human or rat SERT, DAT or NET, respectively (upper section). Whole-cell  $\beta$ -CFT binding to HEK 293 cells

expressing human or rat SERT, DAT or NET (lower section). Data shown are the mean  $\pm$  SD of at least three independent experiments performed in triplicates.

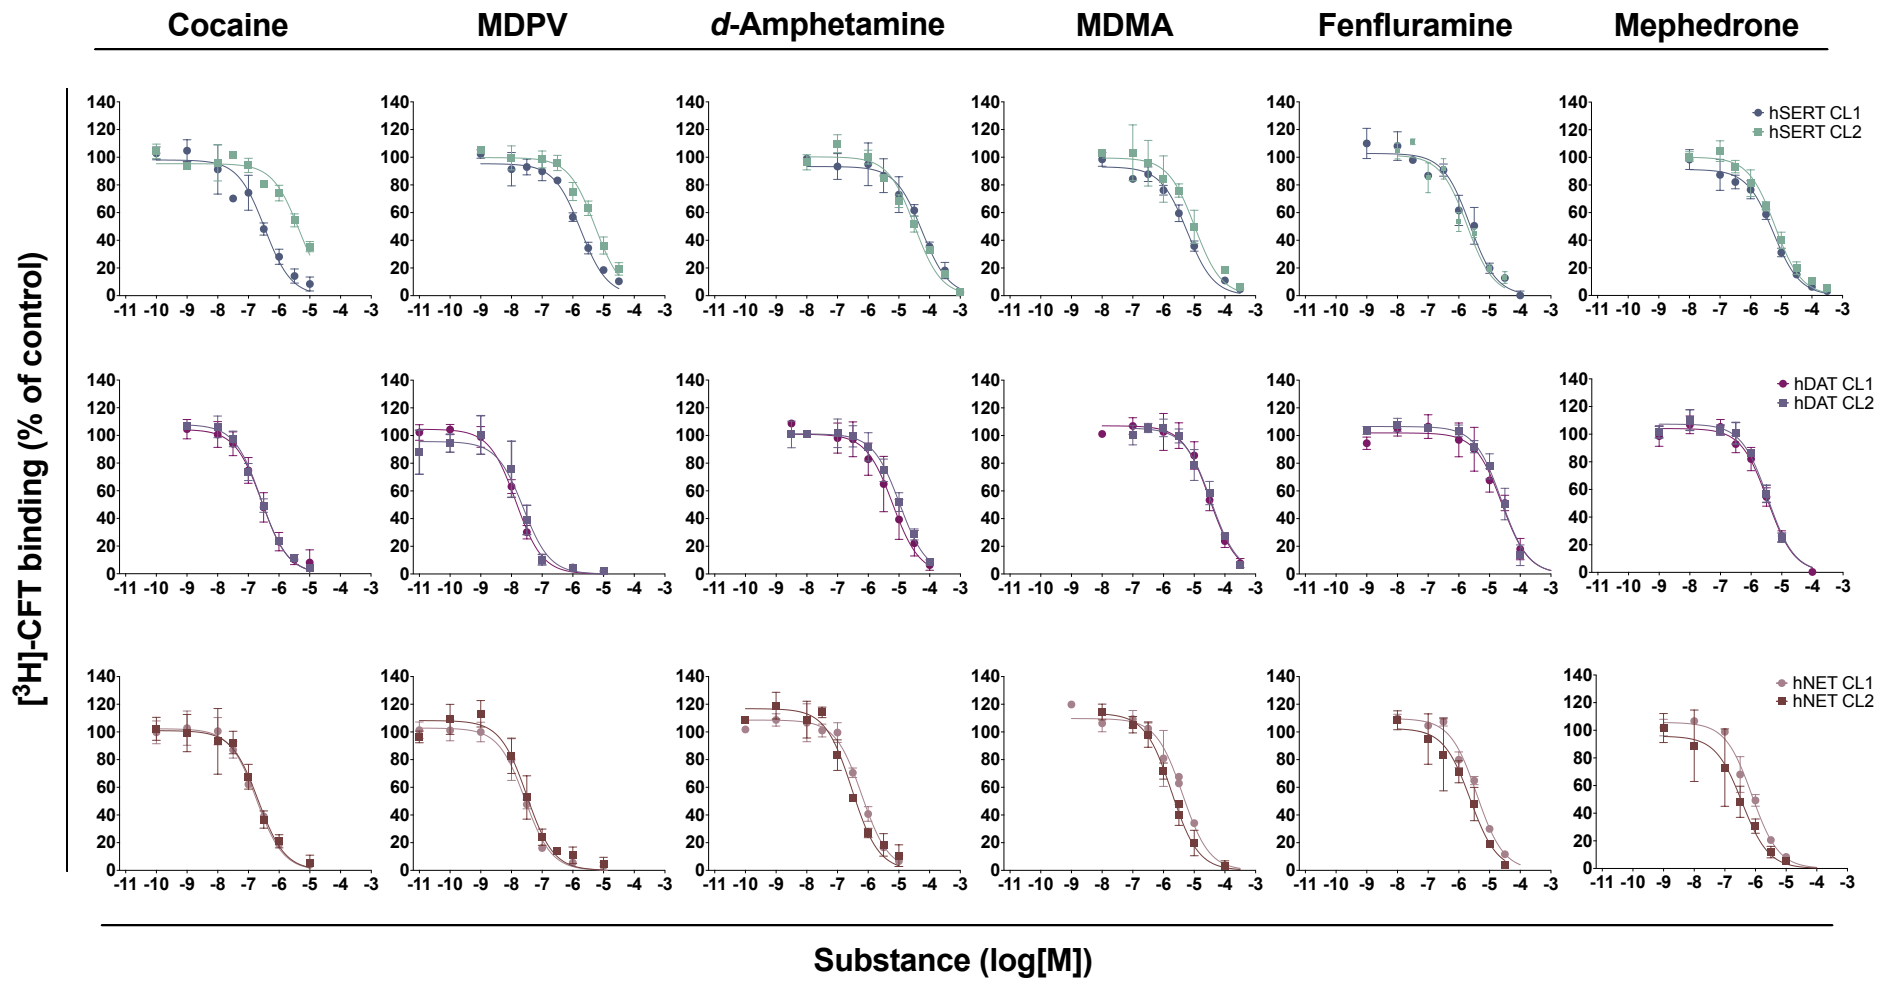

**Supplementary Figure 4.** Radioligand binding inhibition at HEK 293 cells expressing human SERT, DAT or NET. Concentration-response curves for the inhibition of [<sup>3</sup>H]-CFT binding to whole-cells. Data shown are the mean  $\pm$  SD of at least three independent experiments performed in triplicates.



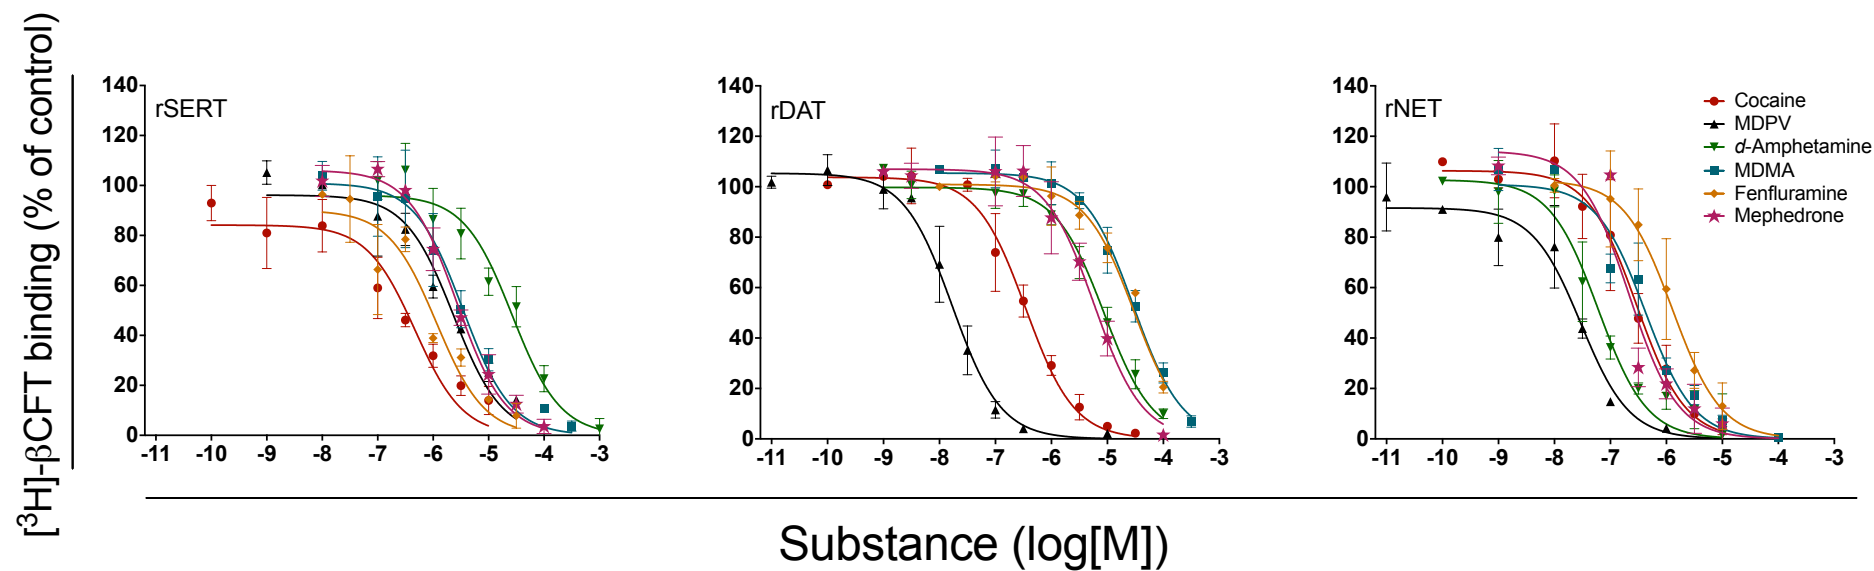

**Supplementary Figure 5.** Radioligand binding inhibition at HEK 293 cells expressing rat SERT, DAT or NET. Concentration-response curves for the inhibition of  $[^3\text{H}]\text{-}\beta\text{CFT}$  binding to whole-cells. Data shown are the mean  $\pm$  SD of at least three independent experiments performed in triplicates.

**Supplementary Table 1.** Comparison of two uptake inhibition methods in HEK 293 cell lines stably expressing human MATs. Unpaired two-tailed t-test with Welch’s correction for comparisons of unequal variances. Color gradient corresponds to the level of significance; white – not significant to dark gray – significant.

|                    | <b>Cocaine</b> | <b>MDPV</b> | <b><i>d</i>-Amphetamine</b> | <b>P value</b> | <b>MDMA</b> | <b>Fenfluramine</b> | <b>Mephedrone</b> |
|--------------------|----------------|-------------|-----------------------------|----------------|-------------|---------------------|-------------------|
| <b>Cell line 1</b> |                |             |                             | <b>SERT</b>    |             |                     |                   |
| Method 1           | 0.9114         | 0.2484      | 0.0138                      | 0.0024         | 0.0025      | 0.2361              |                   |
| Method 2           |                |             |                             |                |             |                     |                   |
|                    |                |             |                             | <b>NET</b>     |             |                     |                   |
| Method 1           | 0.4781         | >0.9999     | <0.0001                     | 0.0176         | 0.0756      | 0.0236              |                   |
| Method 2           |                |             |                             |                |             |                     |                   |
| <b>Cell line 2</b> |                |             |                             | <b>SERT</b>    |             |                     |                   |
| Method 1           | 0.5341         | >0.9999     | 0.0029                      | 0.0041         | 0.0087      | 0.0032              |                   |
| Method 2           |                |             |                             |                |             |                     |                   |
|                    |                |             |                             | <b>DAT</b>     |             |                     |                   |
| Method 1           | 0.1649         | 0.2199      | <0.0001                     | 0.0003         | 0.0834      | 0.4820              |                   |
| Method 2           |                |             |                             |                |             |                     |                   |
|                    |                |             |                             | <b>NET</b>     |             |                     |                   |
| Method 1           | 0.1784         | 0.1963      | 0.0234                      | 0.0461         | 0.2681      | 0.1286              |                   |
| Method 2           |                |             |                             |                |             |                     |                   |

**Supplementary Table 2.** Comparison of inhibition profiles at two HEK 293 cell lines stably expressing human MATs. Unpaired two-tailed t-test with Welch's correction for comparisons of unequal variances. Color gradient corresponds to the level of significance; white – not significant to dark gray – significant.

|                 | Cocaine     | MDPV    | <i>d</i> -Amphetamine | MDMA           | Fenfluramine | Mephedrone |
|-----------------|-------------|---------|-----------------------|----------------|--------------|------------|
|                 |             |         |                       | <b>P value</b> |              |            |
| <b>Method 1</b> | <b>SERT</b> |         |                       |                |              |            |
| Cell line 1     | 0.0002      | 0.0193  | 0.0996                | 0.0145         | 0.0032       | 0.4478     |
| Cell line 2     |             |         |                       |                |              |            |
|                 |             |         |                       | <b>DAT</b>     |              |            |
| Cell line 1     | 0.1226      | 0.0887  | 0.1889                | 0.0057         | 0.4337       | 0.7558     |
| Cell line 2     |             |         |                       |                |              |            |
|                 |             |         |                       | <b>NET</b>     |              |            |
| Cell line 1     | 0.6570      | >0.9999 | 0.0009                | 0.0493         | 0.1183       | 0.0008     |
| Cell line 2     |             |         |                       |                |              |            |
| <b>Method 2</b> | <b>SERT</b> |         |                       |                |              |            |
| Cell line 1     | 0.02        | <0.0001 | 0.8299                | 0.0199         | 0.0002       | 0.0354     |
| Cell line 2     |             |         |                       |                |              |            |
|                 |             |         |                       | <b>NET</b>     |              |            |
| Cell line 1     | >0.9999     | 0.1963  | 0.6560                | 0.0004         | 0.6175       | 0.0003     |
| Cell line 2     |             |         |                       |                |              |            |

**Supplementary Table 3.** Inhibition profile comparison of three HEK 293 cell lines stably expressing human or rat MATs, assayed by Method 1.

One-way ANOVA followed by Tukey's post-test. Color gradient corresponds to the level of significance; white – not significant to dark gray – significant.

|                 | Cocaine | MDPV   | <i>d</i> -Amphetamine | P value     | MDMA    | Fenfluramine | Mephedrone |
|-----------------|---------|--------|-----------------------|-------------|---------|--------------|------------|
| <b>Method 1</b> |         |        |                       | <b>SERT</b> |         |              |            |
| Cell line 1     |         |        |                       |             |         |              |            |
| Cell line 2     | 0.0002  | 0.0248 | 0.023                 |             | 0.0022  | 0.0078       | 0.6921     |
| Cell line 3     |         |        |                       |             |         |              |            |
|                 |         |        |                       | <b>DAT</b>  |         |              |            |
| Cell line 1     |         |        |                       |             |         |              |            |
| Cell line 2     | 0.0708  | 0.4042 | 0.0348                |             | 0.0076  | <0.0001      | 0.0051     |
| Cell line 3     |         |        |                       |             |         |              |            |
|                 |         |        |                       | <b>NET</b>  |         |              |            |
| Cell line 1     |         |        |                       |             |         |              |            |
| Cell line 2     | <0.0001 | 0.003  | 0.0004                |             | <0.0001 | 0.0021       | <0.0001    |
| Cell line 3     |         |        |                       |             |         |              |            |

**Supplementary Table 4.** Comparison of binding inhibition profiles at two HEK 293 cell lines stably expressing human MATs. Unpaired two-tailed t-test with Welch’s correction for comparisons of unequal variances. Color gradient corresponds to the level of significance; white – not significant to dark gray – significant.

|             | <b>Cocaine</b> | <b>MDPV</b> | <b><i>d</i>-Amphetamine</b> | <b>MDMA</b> | <b>Fenfluramine</b> | <b>Mephedrone</b> |
|-------------|----------------|-------------|-----------------------------|-------------|---------------------|-------------------|
|             | <b>P value</b> |             |                             |             |                     |                   |
|             | <b>SERT</b>    |             |                             |             |                     |                   |
| Cell line 1 | 0.0187         | 0.0013      | 0.0065                      | 0.0392      | 0.2026              | 0.9170            |
| Cell line 2 |                |             |                             |             |                     |                   |
|             | <b>DAT</b>     |             |                             |             |                     |                   |
| Cell line 1 | 0.8400         | 0.0531      | 0.0564                      | 0.7563      | 0.8804              | >0.9999           |
| Cell line 2 |                |             |                             |             |                     |                   |
|             | <b>NET</b>     |             |                             |             |                     |                   |
| Cell line 1 | 0.4178         | 0.6108      | 0.0034                      | 0.0059      | 0.3149              | 0.0034            |
| Cell line 2 |                |             |                             |             |                     |                   |

**Supplementary Table 5.** Binding inhibition profile comparison of three HEK 293 cell lines stably expressing human or rat MATs. One-way ANOVA followed by Tukey’s post-test. Color gradient corresponds to the level of significance; white – not significant to dark gray – significant.

|                 | Cocaine | MDPV   | <i>d</i> -Amphetamine | MDMA           | Fenfluramine | Mephedrone |
|-----------------|---------|--------|-----------------------|----------------|--------------|------------|
| <b>Method 1</b> |         |        |                       | <b>P value</b> |              |            |
|                 |         |        |                       | <b>SERT</b>    |              |            |
| Cell line 1     |         |        |                       |                |              |            |
| Cell line 2     | <0.0001 | 0.001  | 0.0002                | 0.0008         | 0.0182       | 0.0299     |
| Cell line 3     |         |        |                       |                |              |            |
|                 |         |        |                       | <b>DAT</b>     |              |            |
| Cell line 1     |         |        |                       |                |              |            |
| Cell line 2     | 0.3111  | 0.1343 | 0.1087                | 0.5627         | 0.3830       | 0.0032     |
| Cell line 3     |         |        |                       |                |              |            |
|                 |         |        |                       | <b>NET</b>     |              |            |
| Cell line 1     |         |        |                       |                |              |            |
| Cell line 2     | 0.2935  | 0.8553 | <0.0001               | <0.0001        | 0.012        | 0.0004     |
| Cell line 3     |         |        |                       |                |              |            |

**Supplementary Table 6.** Kinetic parameters for the uptake and binding of radioligands in adherent transporter-transfected HEK 293 cells. Unpaired two-tailed t-test with Welch's correction for comparisons of unequal variances. Color gradient corresponds to the level of significance; white – not significant to dark gray – significant.

|       | $K_m$                   | $V_{max}$ | $K_d$  | $B_{max}$ |
|-------|-------------------------|-----------|--------|-----------|
|       | P value                 |           |        |           |
|       | Cell line 1/Cell line 2 |           |        |           |
| hSERT | 0.0817                  | 0.0002    | 0.0491 | 0.0261    |
| hDAT  | 0.7175                  | 0.4513    | 0.3852 | 0.1546    |
| hNET  | 0.0163                  | 0.0008    | 0.3300 | >0.9999   |

**Supplementary Table 7.** Kinetic parameters for the uptake and binding of radioligands in human and rat adherent transporter-transfected HEK 293 cells. One-way ANOVA followed by Tukey's post-test. Color gradient corresponds to the level of significance; white – not significant to dark gray – significant.

|      | $K_m$                               | $V_{max}$ | $K_d$  | $B_{max}$ |
|------|-------------------------------------|-----------|--------|-----------|
|      | P value                             |           |        |           |
|      | Cell line 1/Cell line 2/Cell line 3 |           |        |           |
| SERT | 0.0126                              | <0.0001   | 0.0012 | 0.0001    |
| DAT  | 0.1786                              | 0.0021    | 0.2244 | 0.0146    |
| NET  | <0.0001                             | <0.0001   | 0.0972 | 0.4149    |
